# Supplementary material
Source: bioRxiv or medRxiv preprint supplement (https://www.biorxiv.org/highwire/filestream/113612/field_highwire_adjunct_files/1/374553-2.pdf)
Supplement: Supplementary file [file 374553-2.pdf]

**Table S1.** Suggestive associations identified in the SNP-based analysis of the GWAS meta-analysis of cocaine dependence

| SNP         | CHR | BP        | A1 | A2 | beta   | SE    | Direction | N    | P.value  |
|-------------|-----|-----------|----|----|--------|-------|-----------|------|----------|
| rs3075660   | 10  | 84701751  | d  | i  | 0.259  | 0.051 | ++++      | 5546 | 3.83E-07 |
| rs72685414  | 1   | 104966872 | a  | c  | 0.384  | 0.081 | ++++      | 5388 | 1.87E-06 |
| rs79309473  | 13  | 36972202  | t  | g  | -0.233 | 0.049 | ----      | 4960 | 1.89E-06 |
| rs7675557   | 4   | 82970816  | a  | g  | -0.216 | 0.046 | ----      | 6306 | 2.28E-06 |
| rs34285731  | 6   | 26163345  | d  | i  | 0.203  | 0.043 | ++++      | 6328 | 2.36E-06 |
| rs71575441  | 5   | 106788817 | t  | c  | 0.657  | 0.139 | ++++      | 6243 | 2.37E-06 |
| rs11086525  | 20  | 54516338  | c  | g  | 0.201  | 0.043 | ++++      | 6245 | 3.01E-06 |
| rs66606043  | 4   | 82975101  | d  | i  | -0.212 | 0.046 | ----      | 6356 | 3.11E-06 |
| rs806973    | 6   | 26148326  | a  | g  | 0.201  | 0.043 | ++++      | 6263 | 3.14E-06 |
| rs12331448  | 4   | 82987352  | a  | g  | -0.212 | 0.046 | ----      | 6350 | 3.14E-06 |
| rs7664786   | 4   | 82977205  | t  | c  | 0.211  | 0.045 | ++++      | 6376 | 3.18E-06 |
| rs56401801  | 6   | 27301512  | a  | t  | -0.359 | 0.077 | ----      | 6362 | 3.44E-06 |
| rs75344077  | 13  | 36972198  | t  | g  | -0.226 | 0.049 | ----      | 5136 | 3.49E-06 |
| rs71537559  | 6   | 27309779  | c  | g  | -0.356 | 0.077 | ----      | 6376 | 3.53E-06 |
| rs9997282   | 4   | 82972809  | a  | g  | -0.212 | 0.046 | ----      | 6296 | 3.62E-06 |
| rs35096352  | 5   | 68330793  | d  | i  | 0.217  | 0.047 | ++++      | 5568 | 3.85E-06 |
| rs1009181   | 6   | 26158993  | t  | c  | 0.199  | 0.043 | ++++      | 6378 | 3.88E-06 |
| rs4734387   | 8   | 99193765  | a  | g  | -0.213 | 0.046 | ----      | 5668 | 4.20E-06 |
| rs112252907 | 16  | 6675141   | t  | c  | 0.427  | 0.093 | ++++      | 6360 | 4.43E-06 |
| rs1484873   | 18  | 43206985  | a  | g  | -0.473 | 0.103 | ----      | 6376 | 4.45E-06 |
| rs546090102 | 4   | 82954483  | d  | i  | 0.212  | 0.046 | ++++      | 6160 | 4.59E-06 |
| rs7987484   | 13  | 36949810  | t  | c  | -0.194 | 0.042 | ----      | 6305 | 4.72E-06 |
| rs28360634  | 6   | 27332891  | t  | c  | 0.352  | 0.077 | ++++      | 6378 | 4.89E-06 |
| rs1822525   | 4   | 82968407  | t  | c  | 0.208  | 0.046 | ++++      | 6302 | 4.94E-06 |
| rs57361543  | 3   | 172212144 | a  | g  | -0.202 | 0.044 | ----      | 6158 | 5.09E-06 |
| rs34134613  | 3   | 172212104 | t  | c  | -0.202 | 0.044 | ----      | 6152 | 5.13E-06 |
| rs35678713  | 3   | 172212118 | a  | g  | -0.202 | 0.044 | ----      | 6153 | 5.14E-06 |
| rs1059490   | 6   | 26171250  | t  | c  | 0.197  | 0.043 | ++++      | 6356 | 5.17E-06 |
| rs113497279 | 6   | 26173934  | d  | i  | 0.198  | 0.043 | ++++      | 6348 | 5.19E-06 |
| rs145821959 | 4   | 82999079  | t  | c  | -0.212 | 0.047 | ----      | 6113 | 5.39E-06 |
| rs34633975  | 5   | 44127224  | d  | i  | -0.266 | 0.059 | ----      | 6099 | 5.73E-06 |
| rs144714196 | 16  | 6673898   | a  | g  | -0.423 | 0.093 | ----      | 6367 | 5.83E-06 |
| rs13117485  | 4   | 83003033  | a  | g  | -0.212 | 0.047 | ----      | 6069 | 6.03E-06 |
| rs66841633  | 6   | 27382386  | t  | g  | -0.346 | 0.077 | ----      | 6378 | 6.14E-06 |
| rs112622170 | 16  | 6671860   | a  | g  | 0.426  | 0.094 | ++++      | 6357 | 6.16E-06 |
| rs67769911  | 4   | 117607070 | a  | c  | 0.264  | 0.059 | ++++      | 6143 | 6.33E-06 |
| rs10616432  | 13  | 36960314  | d  | i  | -0.190 | 0.042 | ----      | 6345 | 6.44E-06 |
| rs9576051   | 13  | 37010541  | t  | c  | -0.200 | 0.044 | ----      | 6086 | 6.44E-06 |
| rs73973283  | 18  | 73757906  | a  | c  | 0.563  | 0.125 | ++++      | 6286 | 6.46E-06 |
| rs34953377  | 6   | 27381660  | t  | c  | 0.346  | 0.077 | ++++      | 6376 | 6.50E-06 |
| rs17664902  | 16  | 6678289   | t  | c  | 0.418  | 0.093 | ++++      | 6371 | 6.54E-06 |
| rs13218537  | 6   | 27377235  | a  | g  | 0.345  | 0.077 | ++++      | 6377 | 6.57E-06 |
| rs34332556  | 6   | 27357414  | c  | g  | 0.346  | 0.077 | ++++      | 6376 | 6.66E-06 |
| rs71559024  | 6   | 27352750  | a  | g  | -0.346 | 0.077 | ----      | 6376 | 6.66E-06 |
| rs73973287  | 18  | 73760197  | a  | g  | -0.563 | 0.125 | ----      | 6283 | 6.67E-06 |

|              |    |           |   |   |        |       |      |      |          |
|--------------|----|-----------|---|---|--------|-------|------|------|----------|
| rs17328679   | 9  | 28964440  | a | g | -0.309 | 0.069 | ---- | 6370 | 6.86E-06 |
| rs35735220   | 9  | 28963289  | t | c | -0.309 | 0.069 | ---- | 6370 | 6.86E-06 |
| rs13191474   | 6  | 27413345  | t | c | -0.344 | 0.077 | ---- | 6378 | 6.99E-06 |
| rs13195040   | 6  | 27413924  | a | g | 0.344  | 0.077 | ++++ | 6378 | 6.99E-06 |
| rs41269265   | 6  | 27425349  | t | c | 0.344  | 0.077 | ++++ | 6378 | 6.99E-06 |
| rs148179194  | 3  | 50798652  | t | c | 0.881  | 0.196 | ++++ | 6327 | 7.03E-06 |
| rs116108034  | 3  | 50615472  | t | c | -0.855 | 0.191 | ---- | 6333 | 7.08E-06 |
| rs7332726    | 13 | 88150884  | a | g | 0.557  | 0.124 | ++++ | 6064 | 7.10E-06 |
| rs74398847   | 18 | 73769298  | a | c | 0.566  | 0.126 | ++++ | 6267 | 7.19E-06 |
| rs17721102   | 16 | 6675293   | t | g | 0.417  | 0.093 | ++++ | 6371 | 7.27E-06 |
| rs75737660   | 16 | 6675241   | a | c | -0.417 | 0.093 | ---- | 6371 | 7.27E-06 |
| rs12444339   | 16 | 6670858   | t | c | 0.425  | 0.095 | ++++ | 6344 | 7.30E-06 |
| rs10121366   | 9  | 118244022 | t | c | -0.279 | 0.062 | ---- | 6370 | 7.33E-06 |
| rs67383460   | 4  | 117607439 | t | c | 0.262  | 0.059 | ++++ | 6133 | 7.45E-06 |
| rs12443694   | 16 | 6670552   | t | c | 0.425  | 0.095 | ++++ | 6340 | 7.51E-06 |
| rs200257434  | 3  | 23971092  | d | i | 0.373  | 0.083 | +++  | 5756 | 7.53E-06 |
| rs13119377   | 4  | 83003206  | t | c | -0.210 | 0.047 | ---- | 6062 | 7.57E-06 |
| rs111848188  | 18 | 73760089  | t | c | -0.558 | 0.125 | ---- | 6282 | 7.58E-06 |
| rs73973286   | 18 | 73760167  | t | c | -0.558 | 0.125 | ---- | 6282 | 7.58E-06 |
| rs73973288   | 18 | 73760261  | a | c | 0.558  | 0.125 | ++++ | 6282 | 7.58E-06 |
| rs35120058   | 6  | 27358166  | a | g | 0.344  | 0.077 | ++++ | 6357 | 7.61E-06 |
| rs35383285   | 4  | 83003977  | d | i | 0.202  | 0.045 | ++++ | 6014 | 7.61E-06 |
| rs334878     | 5  | 54519878  | a | g | -0.270 | 0.060 | ---- | 6282 | 7.67E-06 |
| rs34802424   | 3  | 172211878 | t | c | -0.197 | 0.044 | ---- | 6188 | 7.77E-06 |
| rs4132904    | 13 | 36963788  | a | c | 0.187  | 0.042 | ++++ | 6378 | 7.79E-06 |
| rs540097409  | 2  | 153209227 | d | i | -0.414 | 0.093 | ---- | 5226 | 7.81E-06 |
| rs3800318    | 6  | 27263641  | a | t | 0.246  | 0.055 | +++  | 6372 | 7.84E-06 |
| rs1653168    | 18 | 73773153  | a | g | 0.554  | 0.124 | ++++ | 6297 | 7.85E-06 |
| rs13291489   | 9  | 28973832  | t | c | -0.308 | 0.069 | ---- | 6360 | 7.99E-06 |
| rs6819504    | 4  | 82983435  | t | c | 0.205  | 0.046 | ++++ | 6260 | 8.17E-06 |
| rs13203358   | 6  | 26590578  | a | t | 0.307  | 0.069 | ++++ | 6378 | 8.24E-06 |
| rs34229567   | 6  | 26588521  | t | c | -0.307 | 0.069 | ---- | 6378 | 8.24E-06 |
| rs34071253   | 6  | 27391802  | t | c | -0.341 | 0.077 | ---- | 6377 | 8.31E-06 |
| rs35716472   | 6  | 27406607  | c | g | 0.341  | 0.077 | ++++ | 6377 | 8.31E-06 |
| rs13076358   | 3  | 172211743 | a | c | -0.196 | 0.044 | ---- | 6187 | 8.34E-06 |
| rs62545838   | 9  | 28991893  | a | c | -0.306 | 0.069 | ---- | 6350 | 8.46E-06 |
| rs62545840   | 9  | 28992162  | a | g | -0.306 | 0.069 | ---- | 6350 | 8.46E-06 |
| rs201051420  | 3  | 50876987  | d | i | -0.889 | 0.200 | ---- | 6321 | 8.61E-06 |
| rs111332851  | 18 | 73759957  | d | i | 0.555  | 0.125 | ++++ | 6281 | 8.62E-06 |
| rs36097821   | 18 | 73759772  | a | t | -0.555 | 0.125 | ---- | 6281 | 8.62E-06 |
| rs62545841   | 9  | 28993271  | a | g | -0.305 | 0.069 | ---- | 6349 | 8.71E-06 |
| 6:26603811_1 | 6  | 26603811  | a | c | 0.306  | 0.069 | ++++ | 6378 | 9.01E-06 |
| rs9379899    | 6  | 26603015  | a | t | -0.306 | 0.069 | ---- | 6378 | 9.01E-06 |
| rs10759786   | 9  | 118241188 | a | g | -0.276 | 0.062 | ---- | 6361 | 9.05E-06 |
| rs34937527   | 3  | 172211825 | a | g | 0.195  | 0.044 | ++++ | 6188 | 9.10E-06 |
| rs247831     | 16 | 84581893  | c | g | 0.218  | 0.049 | ++++ | 6358 | 9.17E-06 |
| rs554260614  | 6  | 26703058  | d | i | -0.244 | 0.055 | ---- | 5371 | 9.20E-06 |
| rs62357000   | 5  | 30884915  | t | c | 0.558  | 0.126 | ++++ | 6215 | 9.20E-06 |
| rs13211166   | 6  | 27265940  | a | t | -0.244 | 0.055 | ---+ | 6374 | 9.28E-06 |
| rs4410642    | 5  | 44129423  | c | g | 0.288  | 0.065 | ++++ | 6364 | 9.42E-06 |

|             |    |           |   |   |        |       |      |      |          |
|-------------|----|-----------|---|---|--------|-------|------|------|----------|
| rs13208916  | 6  | 26601940  | a | g | -0.304 | 0.069 | ---- | 6374 | 9.43E-06 |
| rs17005376  | 4  | 82989854  | t | c | -0.194 | 0.044 | ---- | 6315 | 9.44E-06 |
| rs146616569 | 3  | 172211706 | a | t | 0.195  | 0.044 | ++++ | 6189 | 9.45E-06 |
| rs148069235 | 1  | 15950064  | a | c | 0.246  | 0.056 | ++++ | 5579 | 9.52E-06 |
| rs10805679  | 5  | 44103219  | a | c | -0.260 | 0.059 | ---- | 6291 | 9.53E-06 |
| rs6767407   | 3  | 84955841  | t | c | 0.234  | 0.053 | ++++ | 6351 | 9.61E-06 |
| rs2245002   | 18 | 73771813  | t | c | -0.549 | 0.124 | ---- | 6300 | 9.71E-06 |
| rs2080197   | 3  | 172214001 | a | g | 0.193  | 0.044 | ++++ | 6257 | 9.85E-06 |
| rs13301616  | 9  | 28957509  | t | c | 0.301  | 0.068 | ++++ | 6372 | 9.86E-06 |
| rs59017600  | 9  | 28956618  | c | g | 0.301  | 0.068 | ++++ | 6372 | 9.86E-06 |
| rs72719332  | 9  | 28962806  | t | c | -0.303 | 0.069 | ---- | 6374 | 9.92E-06 |

\*Gene coordinates based on GRCh37/hg19.
